# Supplementary material for: Small-molecule semiconductors containing dithienylacrylonitrile for high-performance organic field-effect transistors
Source: Royal Society of Chemistry journal article supplement (doi:10.1039/c9tc03726h), 2019-01-01
Supplement: c9tc03726h1.pdf [file c9tc03726h1.pdf]

## Electronic Supporting Information

### **Small-molecule semiconductors containing dithienylacrylonitrile for high-performance organic field-effect transistors**

Dizao Li,<sup>a</sup> Jiabin Zou,<sup>ab</sup> Congyuan Wei,<sup>ac</sup> Yankai Zhou,<sup>ab</sup> Liping Wang,<sup>\*b</sup> Weifeng Zhang<sup>a</sup> and Gui Yu<sup>\*ac</sup>

<sup>a</sup> Beijing National Laboratory for Molecular Sciences, CAS Research/Education Center for Excellence in Molecular Sciences, Institute of Chemistry, Chinese Academy of Sciences, Beijing 100190, P. R. China

<sup>b</sup>School of Materials Science and Engineering, University of Science and Technology Beijing, Beijing 100083, P. R. China

<sup>c</sup>School of Chemical Sciences, University of Chinese Academy of Sciences, Beijing 100049, P. R. China

## 1. Device fabrications and performances of the organic field-effect transistors (OFETs).

The OFET devices based on the small-molecular compounds were fabricated with bottom gate bottom contact (BGBC) configurations. The  $n^{++}$ -Si/SiO<sub>2</sub> (300 nm) substrates were used as the gate electrode/dielectric. The gold/titanium (30 nm/5 nm) was fabricated as source/drain electrodes. The silica substrates were modified with octadecyltrichlorosilane (OTS) to form an OTS self-assembled monolayer on their surfaces. A small-molecule semiconducting thin film layer was fabricated on the OTS-treated substrate by spin-coating. The device performance was evaluated by employed a Keithley 4200 SCS semiconductor parameter analyzer on a probe stage in ambient air. The charge carrier mobility ( $\mu$ ) was calculated from the data in the saturated regime according to the following equation,

$$I_{DS} = \left(\frac{W}{2L}\right)C_i\mu(V_G - V_T)^2$$

In the above equation,  $I_{DS}$ ,  $W/L$ ,  $C_i$ ,  $V_G$  and  $V_T$  are the saturation drain current, the channel width/length, the capacitance per unit area of the gate dielectric layer, the gate voltage and threshold voltage, respectively.

## 2. TGA curves of the DPP-DTE-based compounds

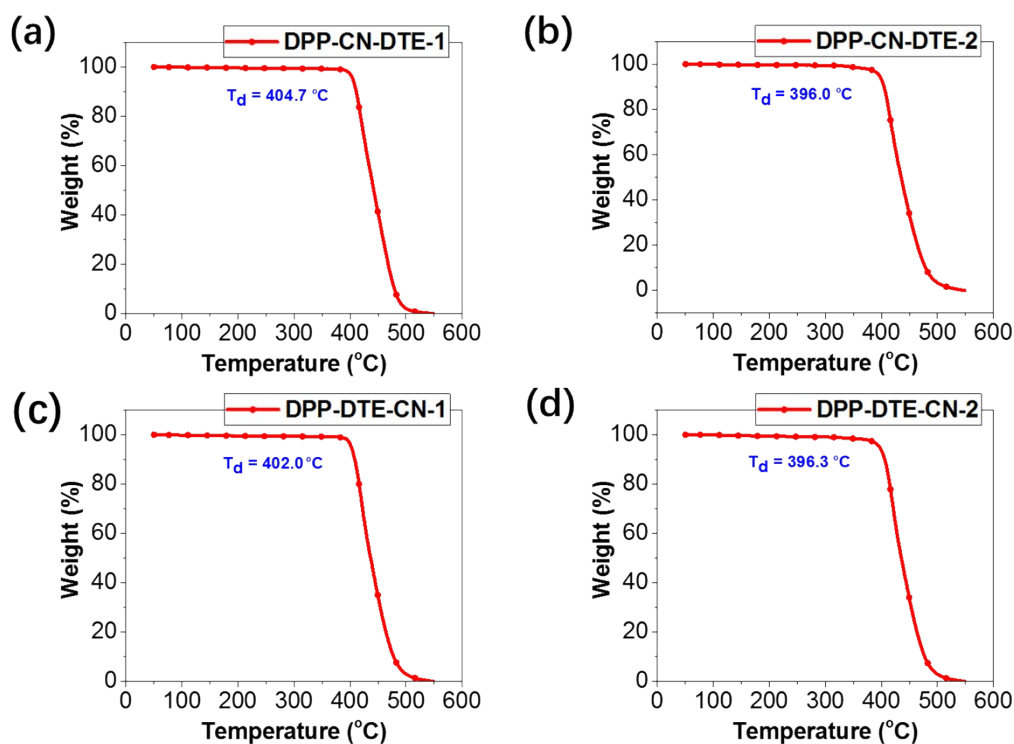

**Fig. S1** TGA curves of the DPP-DTE-based compounds.

## 3. Absorption spectra of the DPP-DTE-based compounds

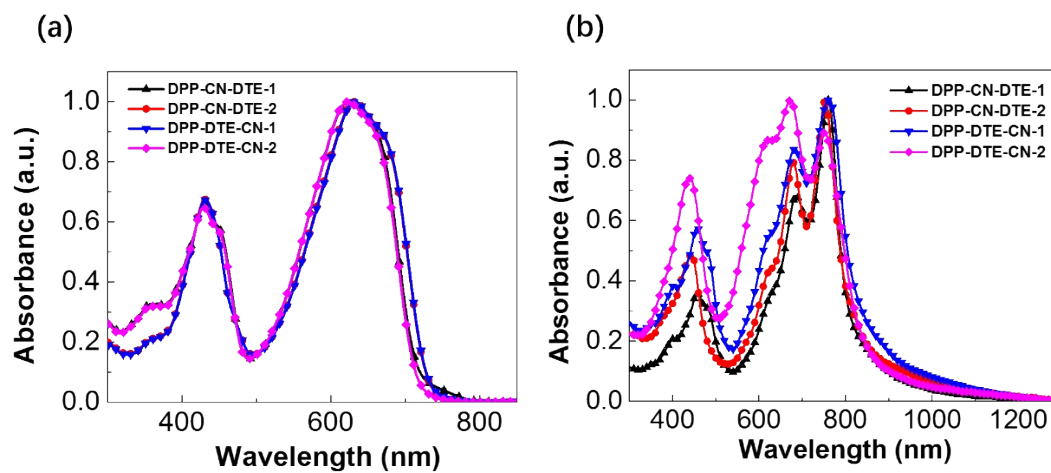

**Fig. S2** UV-Vis-NIR absorption spectra of the DPP-DTE-based compounds in (a) chloroform solutions and (b) thin films.

#### 4. Theoretical calculation results of the DPP-DTE-based compounds

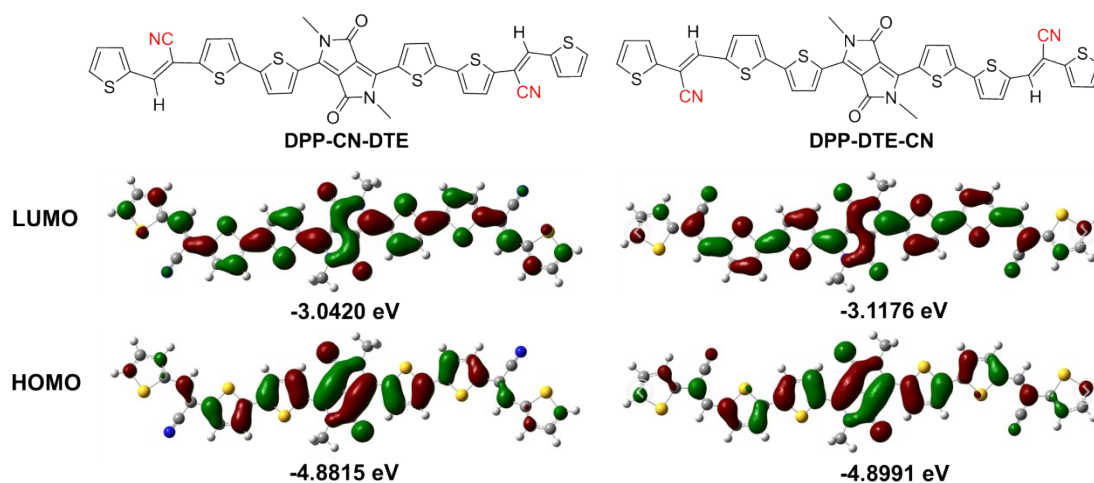

**Fig. S3** Optimized molecular geometries and frontier molecular orbital distributions of the model compounds DPP-CN-DTE and DPP-DTE-CN.

#### 5. NMR spectra of the DPP-DTE-based compounds

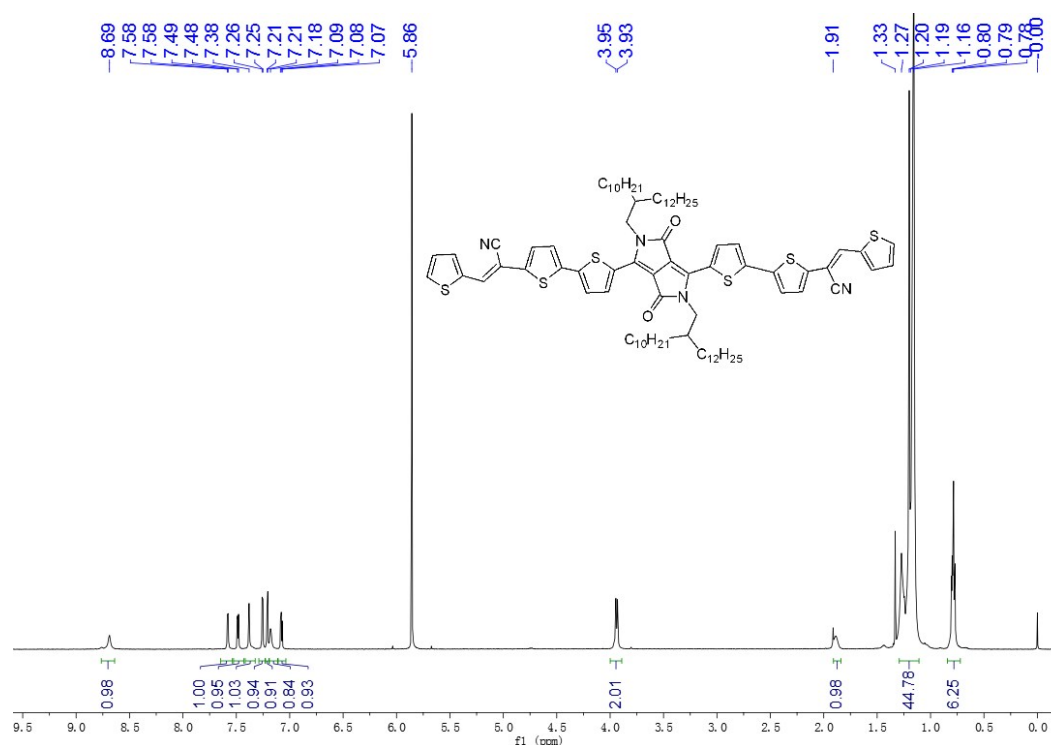

**Fig. S4** <sup>1</sup>H NMR spectrum of DPP-CN-DTE-1.

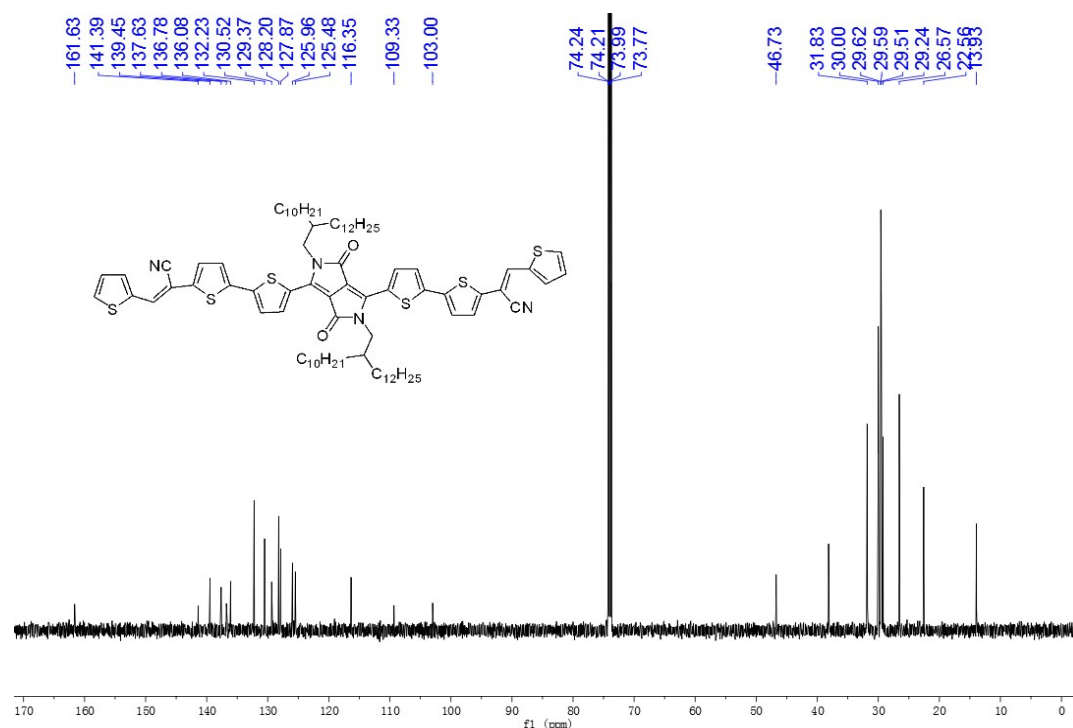

**Fig. S5**  $^{13}\text{C}$  NMR spectrum of DPP-CN-DTE-1.

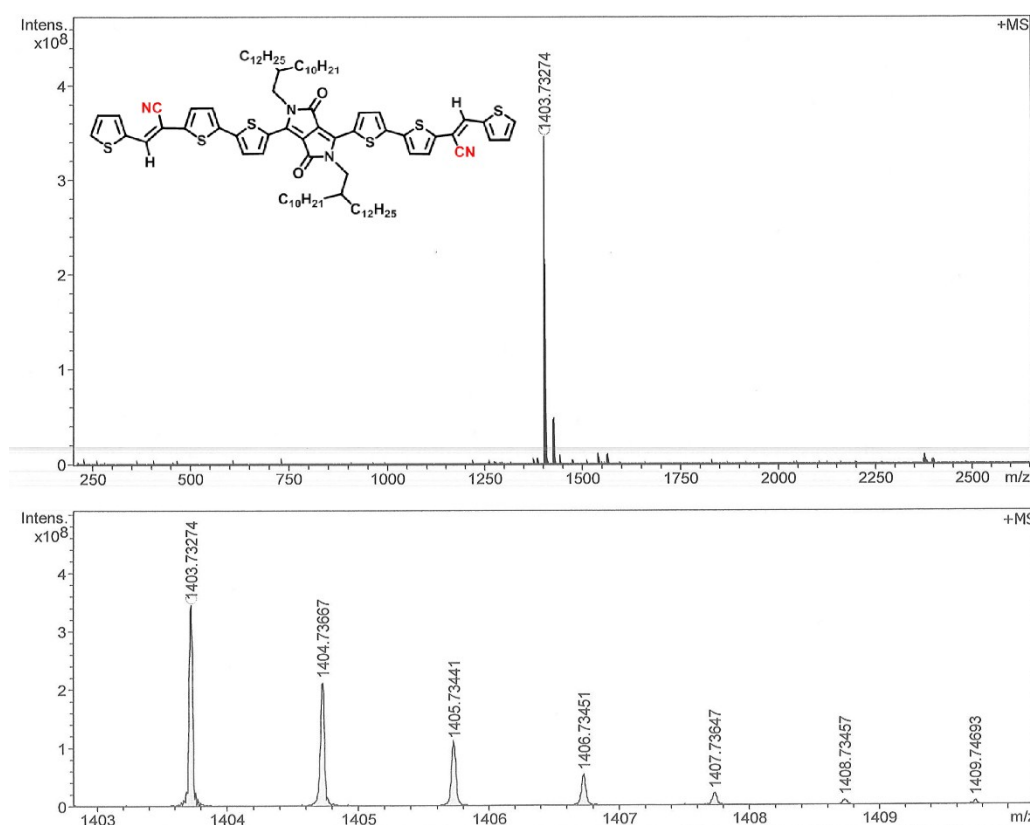

**Fig. S6** HRMS (MALDI) spectrum of DPP-CN-DTE-1.

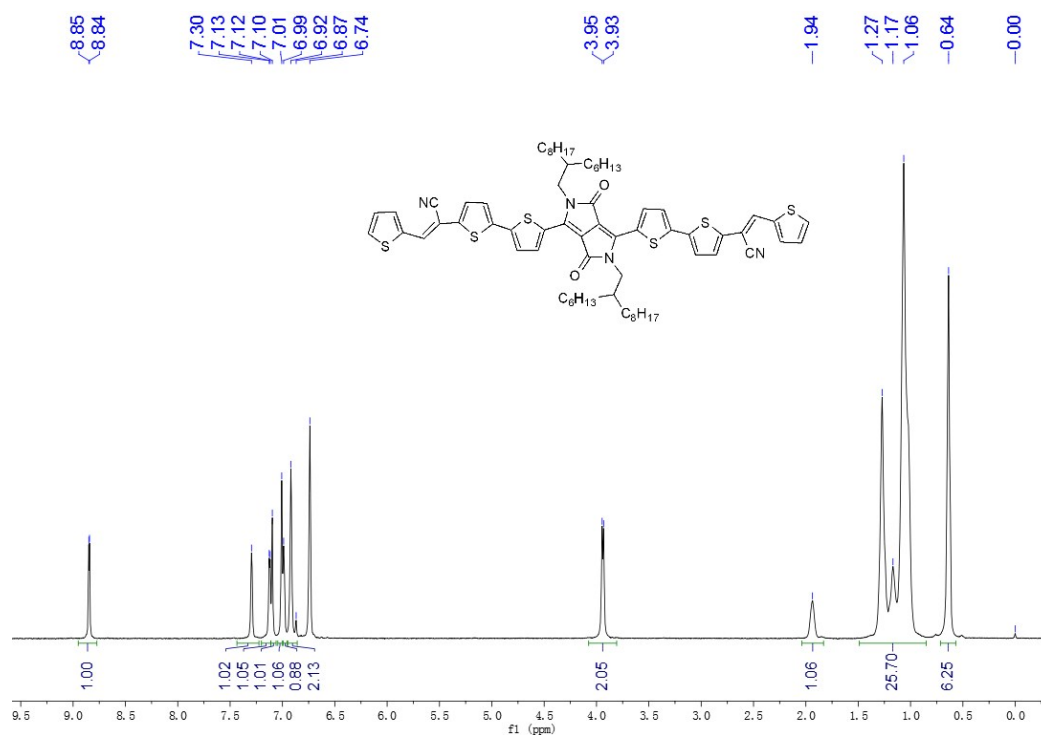

**Fig. S7** <sup>1</sup>H NMR spectrum of DPP-CN-DTE-2.

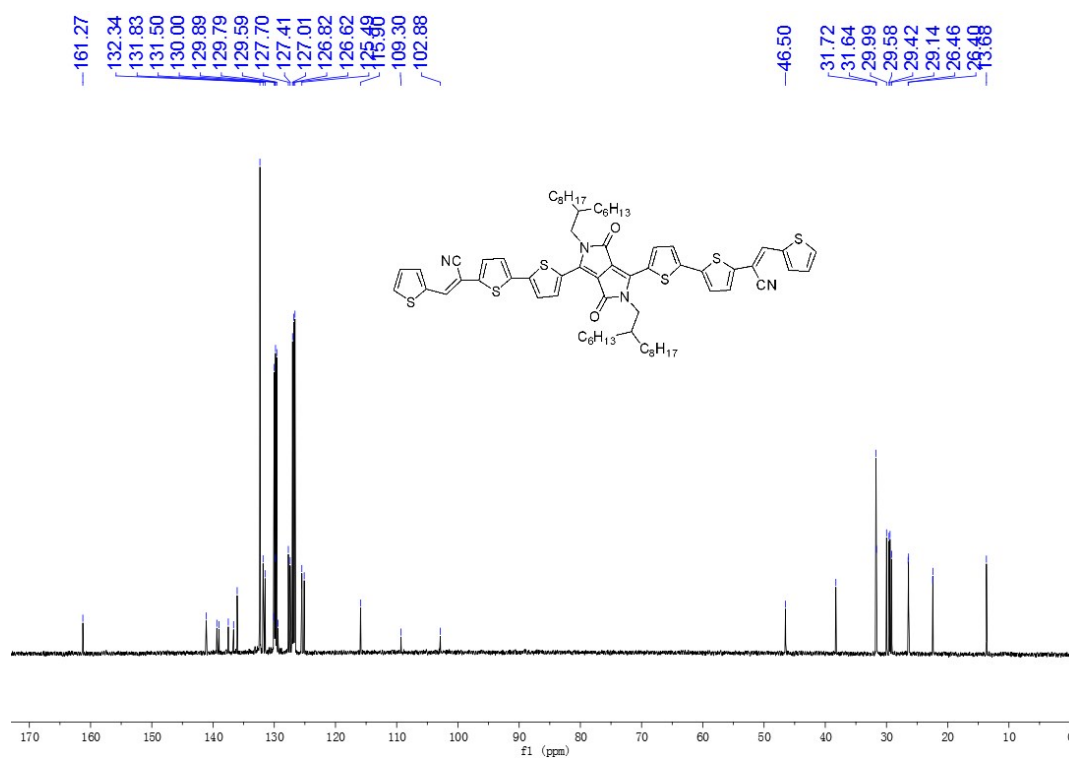

**Fig. S8** <sup>13</sup>C NMR spectrum of DPP-CN-DTE-2.

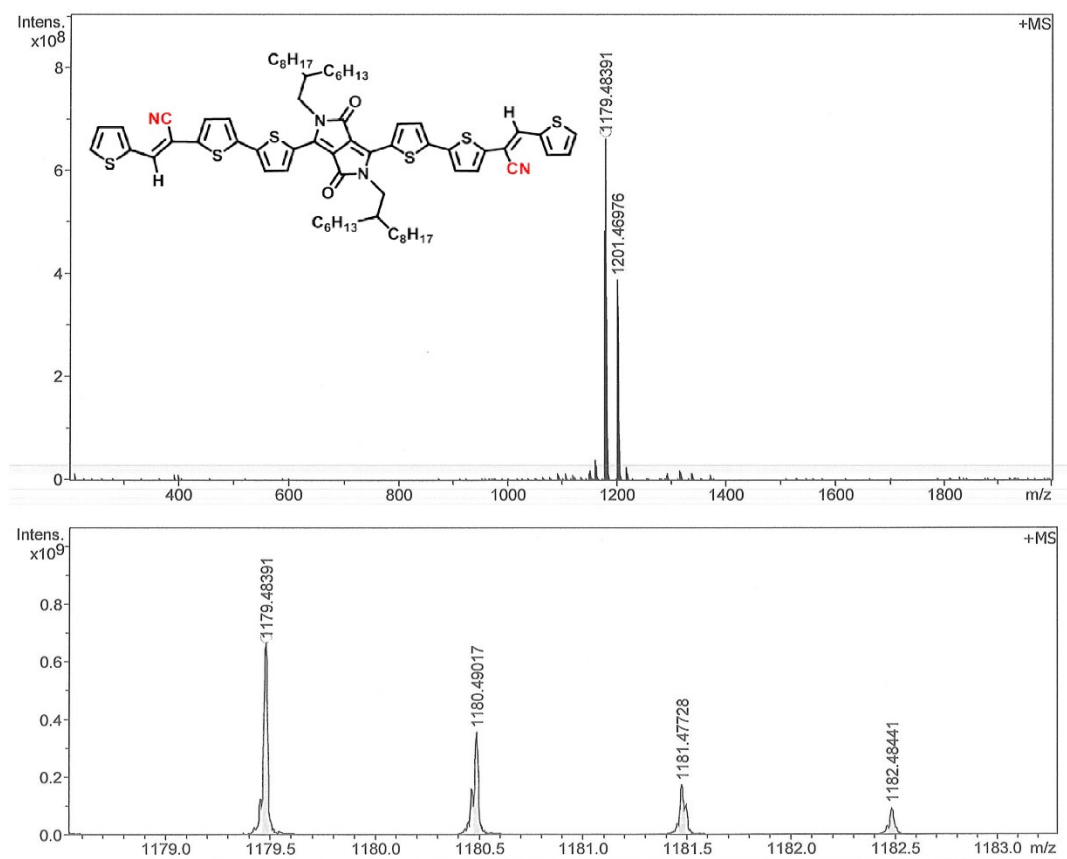

**Fig. S9** HRMS (MALDI) spectrum of DPP-CN-DTE-2.

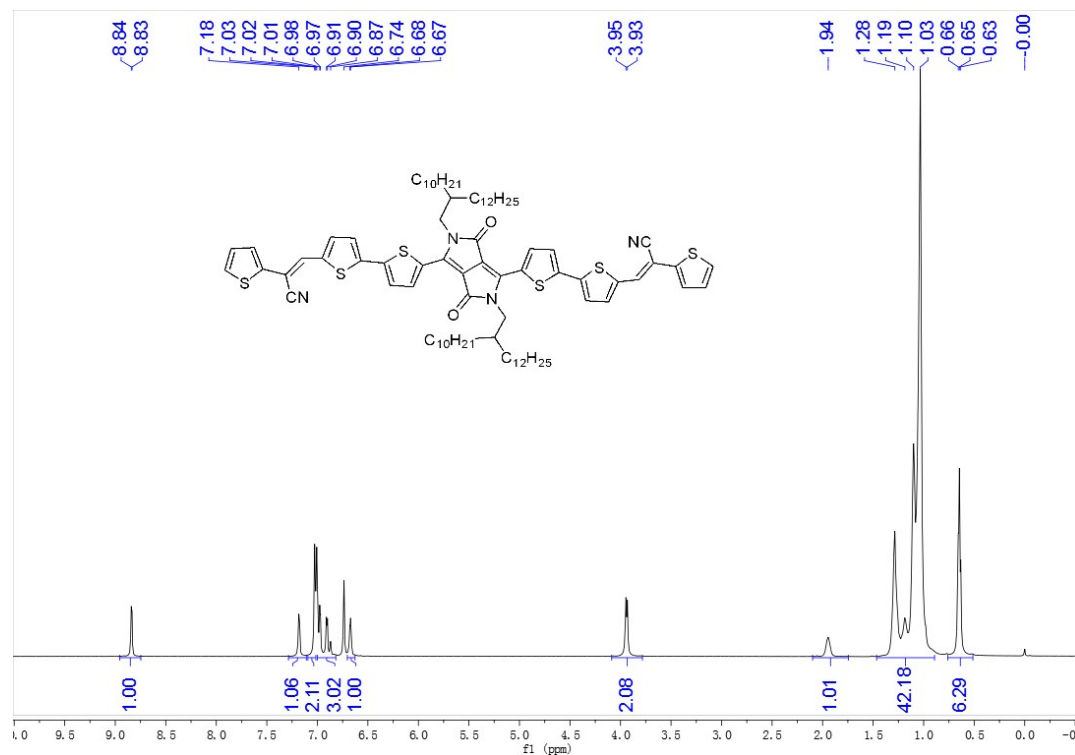

**Fig. S10** <sup>1</sup>H NMR spectrum of DPP-DTE-CN-1.

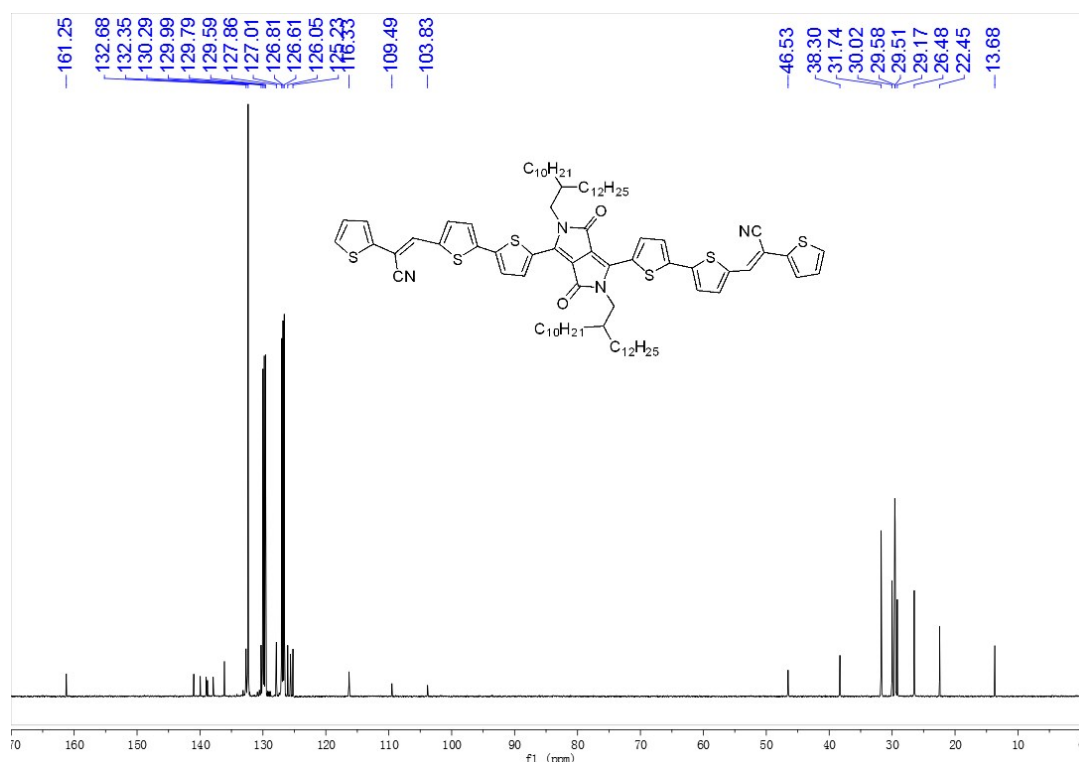

**Fig. S11** <sup>13</sup>C NMR spectrum of DPP-DTE-CN-1.

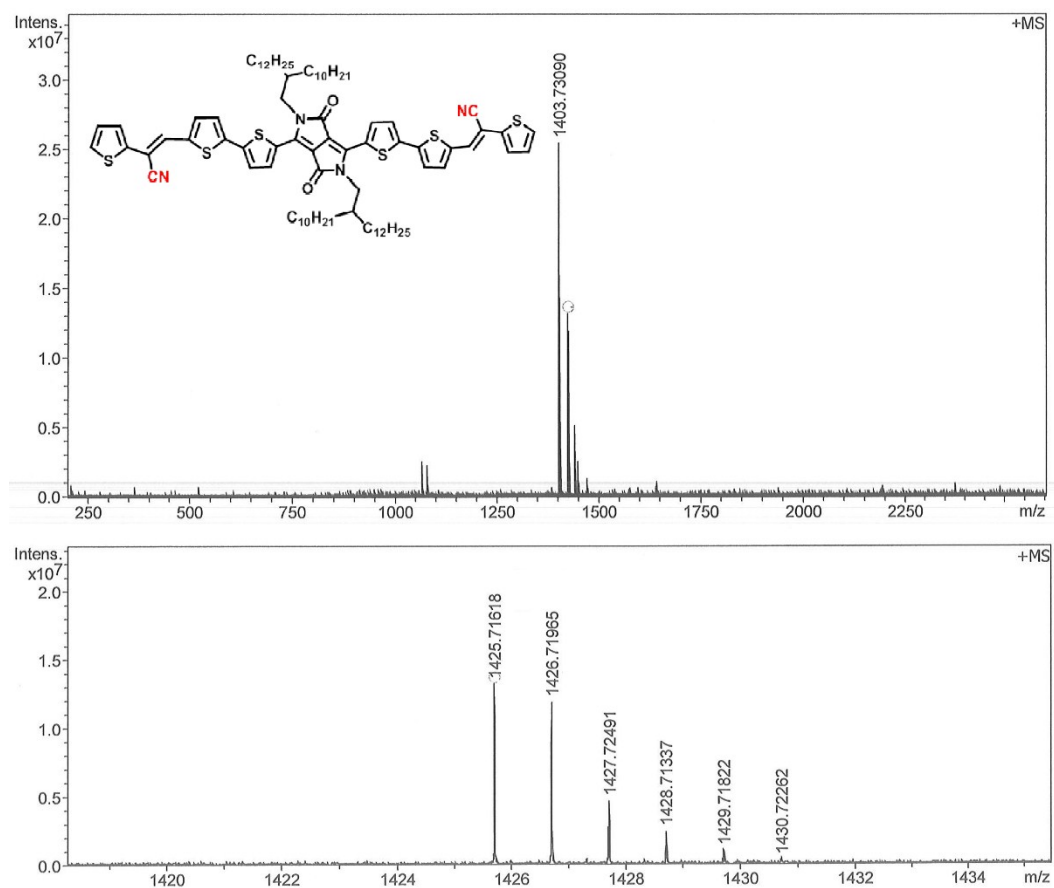

**Fig. S12** HRMS (MALDI) spectrum of DPP-DTE-CN-1.

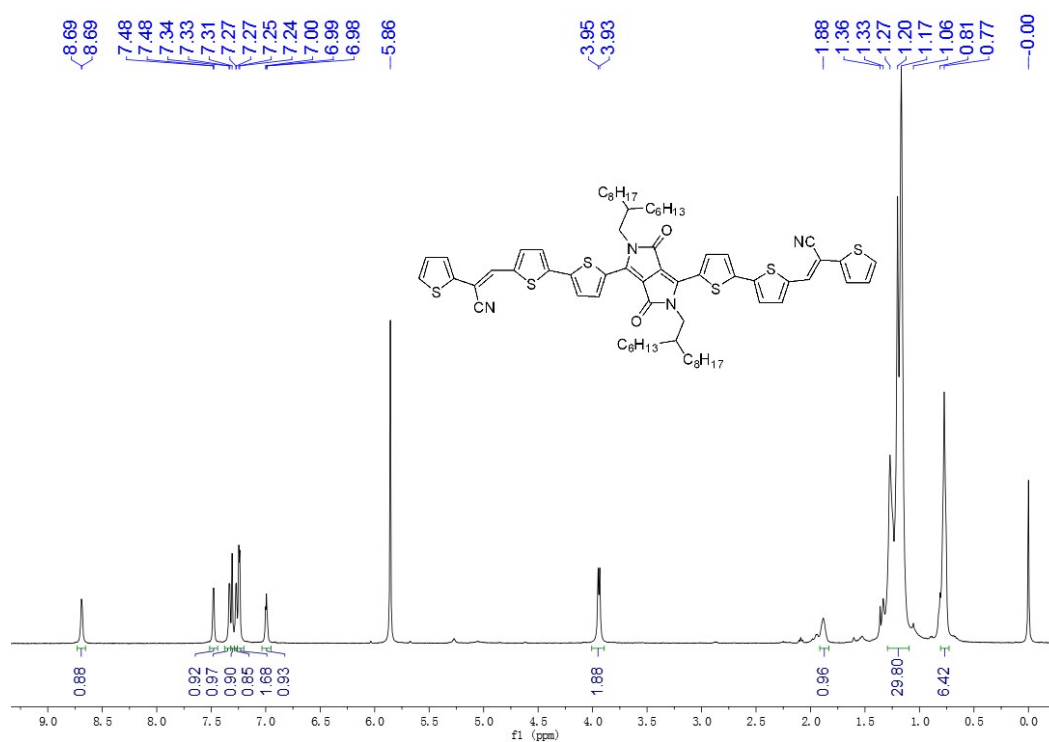

**Fig. S13** <sup>1</sup>H NMR spectrum of DPP-DTE-CN-2.

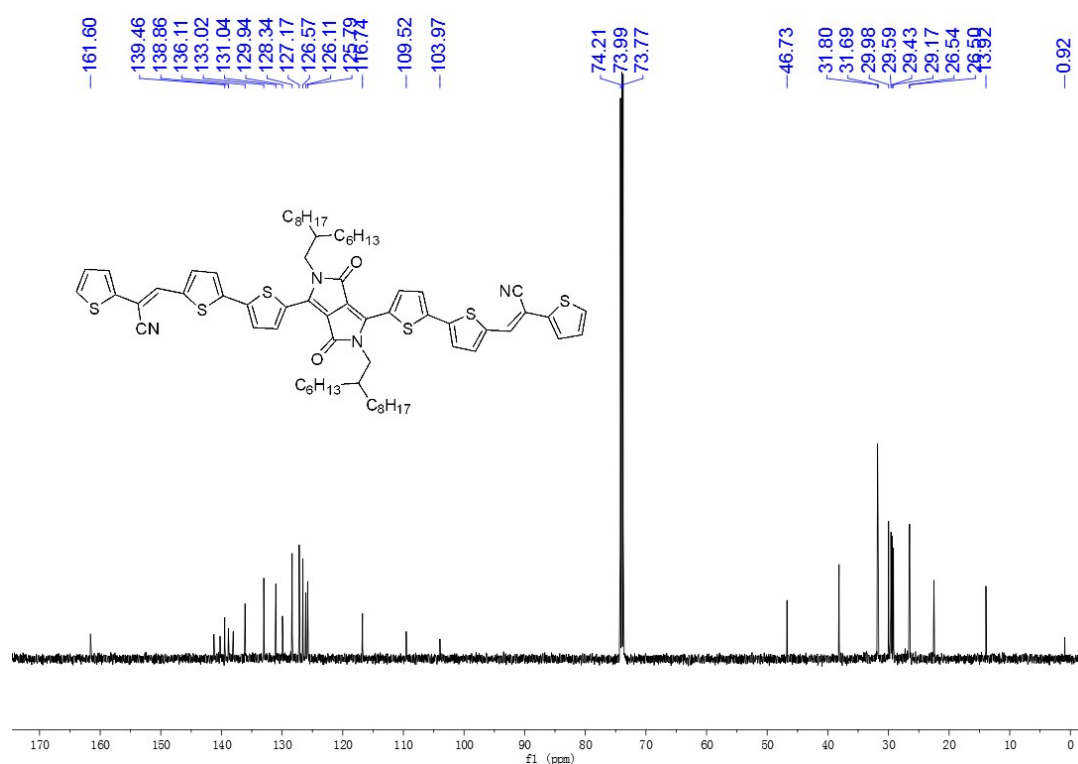

**Fig. S14** <sup>13</sup>C NMR spectrum of DPP-DTE-CN-2.

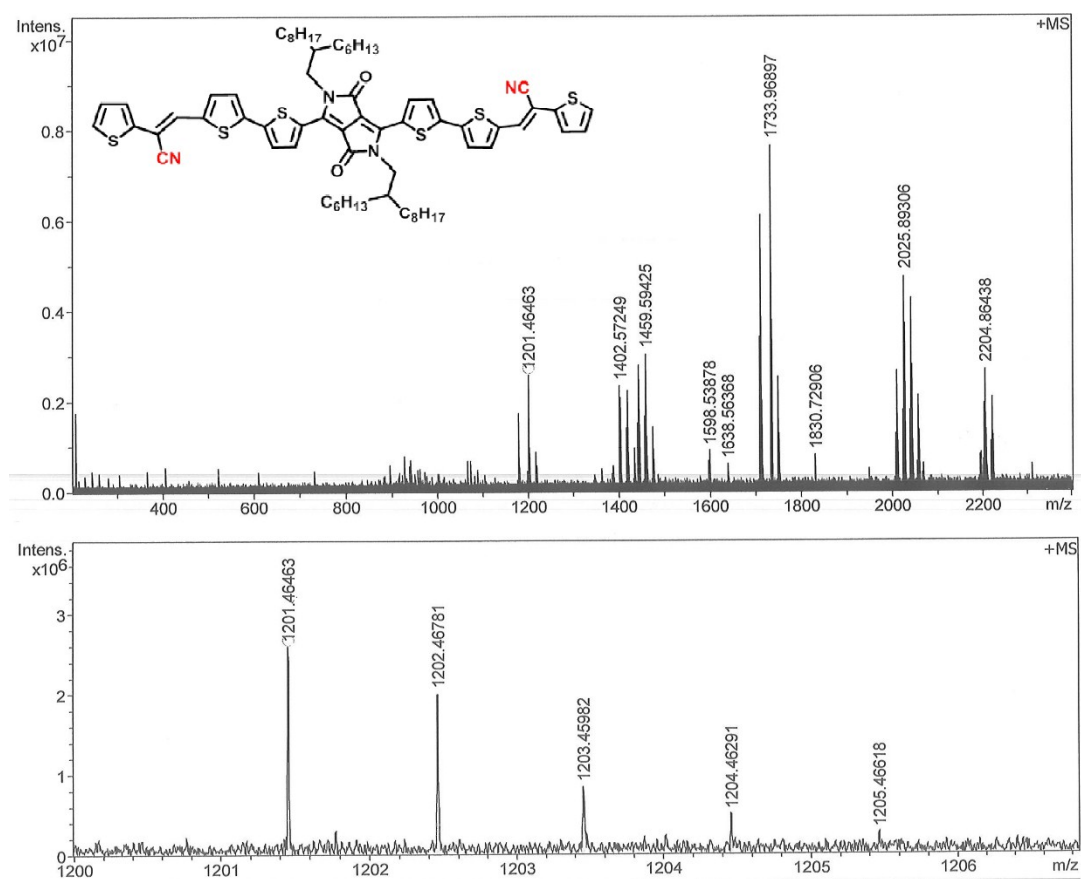

**Fig. S15** HRMS (MALDI) spectrum of DPP-DTE-CN-2.
